# Supplementary material for: Triacylglycerides and Phospholipids from Egg Yolk Differently Influence the Immunostimulating Properties of Egg White Proteins
Source: MDPI journal article supplement (doi:10.3390/nu13103301), 2021-09-22
Supplement: s1 [file s1]

**Supplementary Table S1.** Antibodies used for the analysis of T cell and ILC2 subsets by flow cytometry (all from eBioscience, San Diego, CA, USA).

| Population               | Antibody                    | Clone   | Fluorophore     |
|--------------------------|-----------------------------|---------|-----------------|
|                          | CD16/CD32                   | 2.4G2   |                 |
| CD4 <sup>+</sup> T cells | CD4                         | GK1.5   | Alexa Fluor 700 |
|                          | CD69                        | H1.2F3  | PerCP-Cy5.5     |
|                          | ST2 (IL-33 receptor)        | RMST2-2 | PE              |
| ILC2                     | CD45.2                      | 104     | PE-Cy7          |
|                          | CD3                         | 17A2    | FITC            |
|                          | CD45R (B220)                | RA3-6B2 |                 |
|                          | Hematopoietic lineage CD11b | (M1/70) |                 |
|                          | TER-119                     | TER-119 |                 |
|                          | Ly-G6 (Gr-1)                | RB6-8C5 |                 |
|                          | CD19                        | MB19-1  |                 |
|                          | ST2 (IL-33 receptor)        | RMST2-2 | PE              |
|                          | KLRG1                       | 2F1     | APC eFluor 780  |
|                          | CD278 (ICOS)                | C398.4A | APC             |

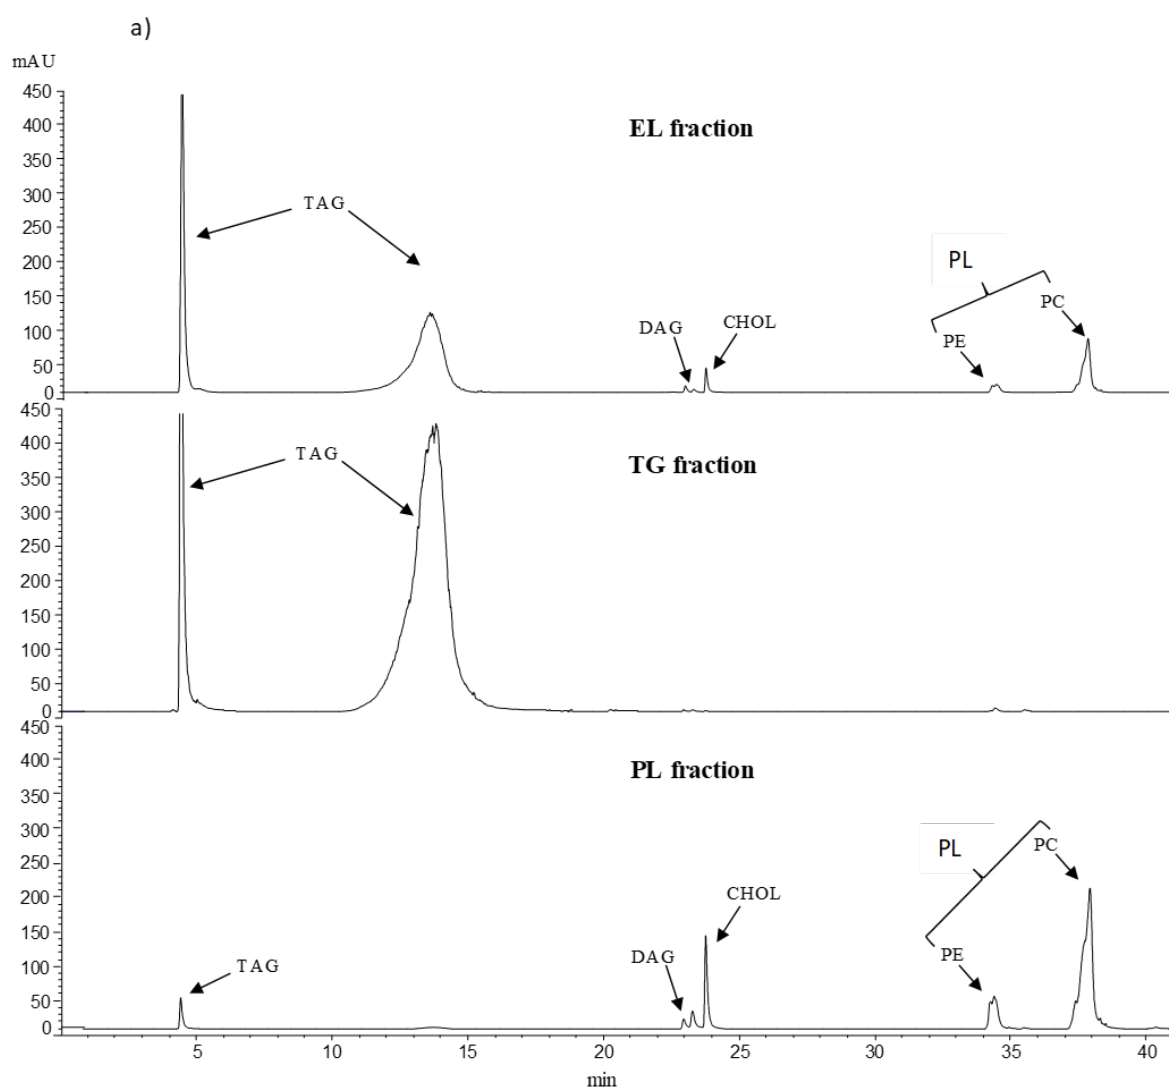

b)

| Lipid classes | EL fraction | TG fraction | PL fraction |
|---------------|-------------|-------------|-------------|
| TAG           | 86.30 %     | 99.78 %     | 6.47 %      |
| DAG           | 0.69 %      | 0.05 %      | 3.99 %      |
| CHOL          | 1.52 %      | 0.01 %      | 11.75 %     |
| PL            | 11.47 %     | 0.14 %      | 77.79 %     |

**Supplementary Figure S1.** Chromatographic profile (a) and percentage of lipid classes (b) of EL, TG, and PL fractions determined by HPLC-ELSD. (TAG, triacylglycerides; DAG, diacylglycerides; CHOL, cholesterol; PL, phospholipids; PE, phosphatidylethanolamine; PC, phosphatidylcholine)

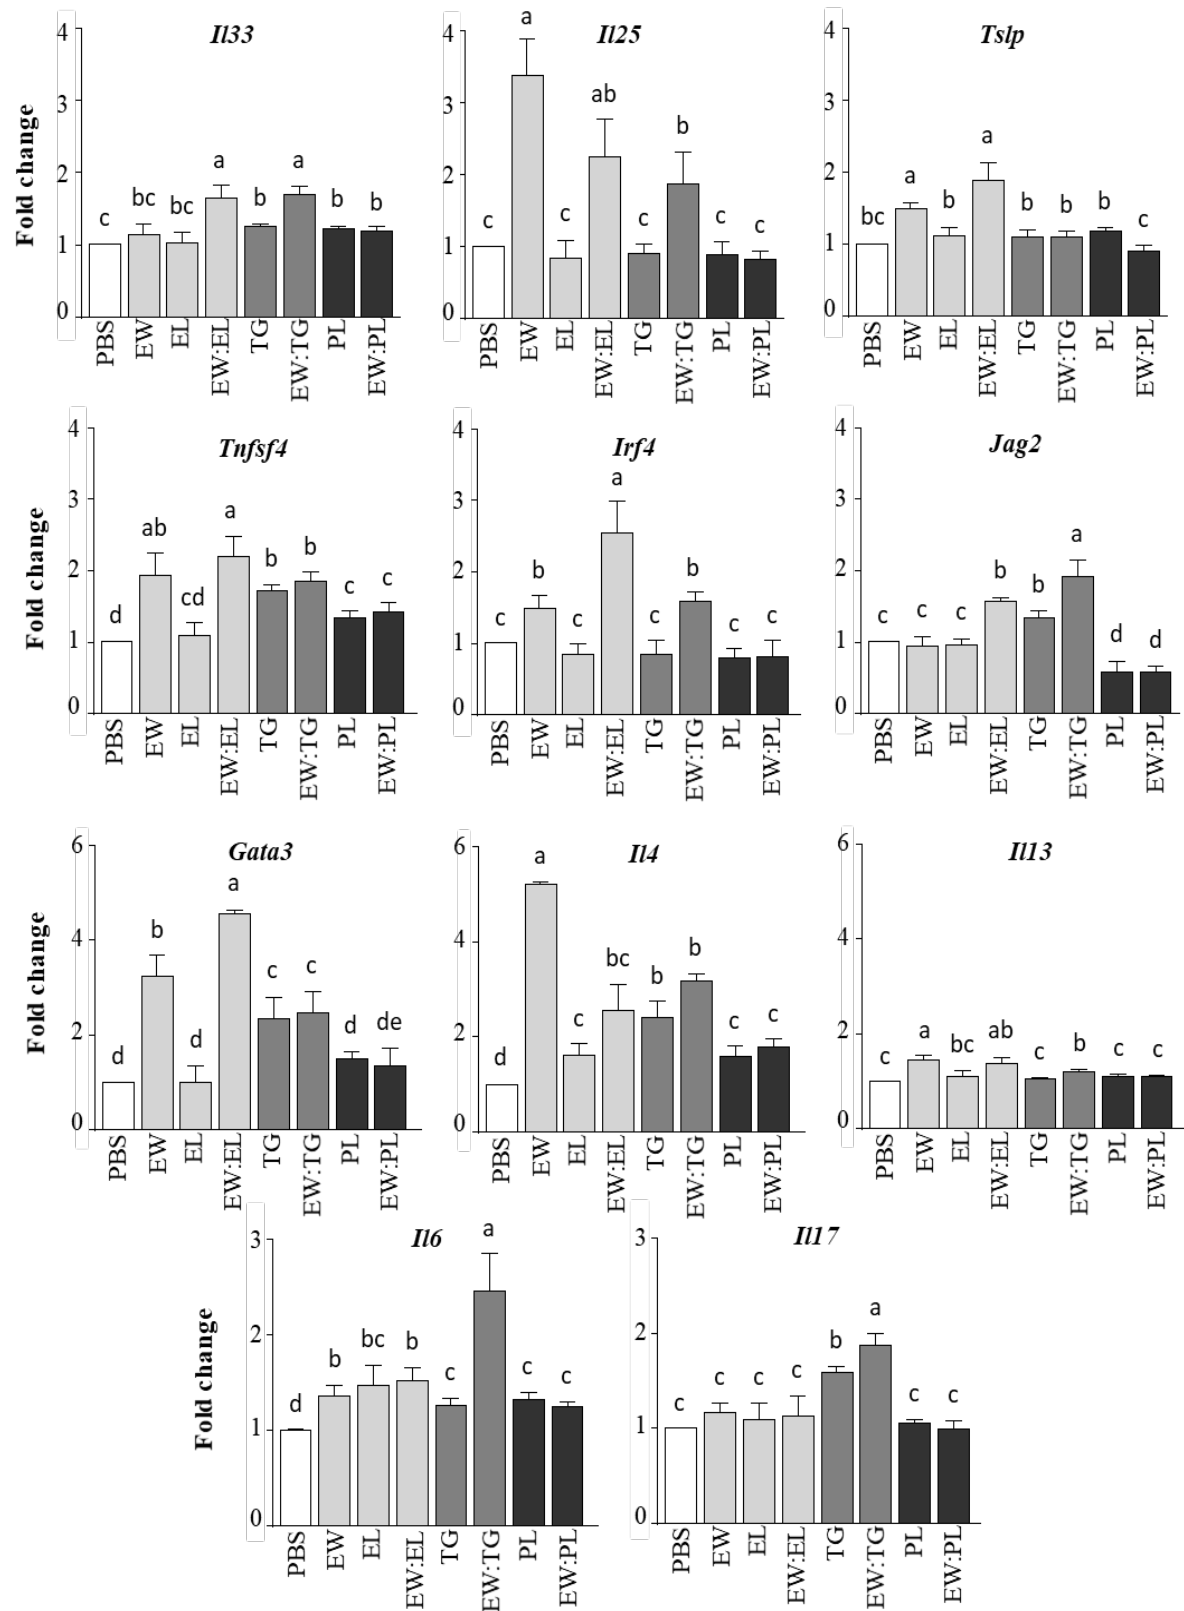

**Supplementary Figure S2.** Relative gene expression of *Il33*, *Il25*, *Tslp*, *Tnfsf4*, *Irf4*, *Jag2*, *Gata3*, *Il4*, *Il13*, *Il6*, and *Il17*, determined in the jejunum of mice administered intragastrically:

PBS, EW, EL, EW:EL, EW:TG, EW:PL, for 6 consecutive days. Gene expression was normalized to the reference gene *Actb* and compared with mice administered PBS. Data are expressed as means  $\pm$  SEM (n=6). Different letters indicate statistically significant differences ( $p<0.05$ ) among different mouse groups.

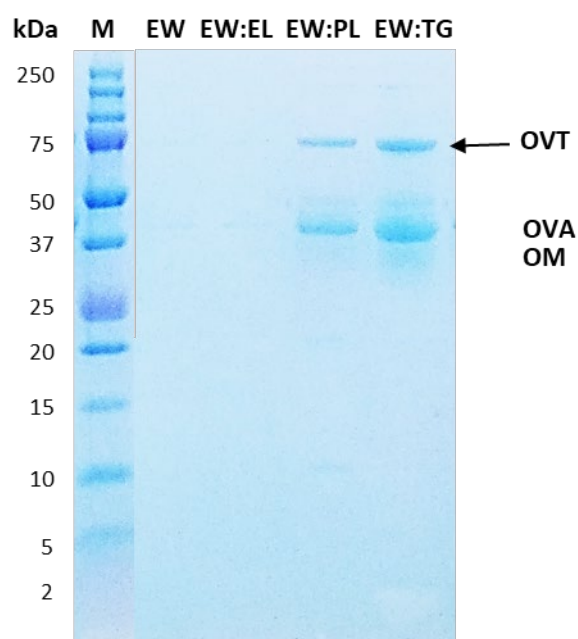

**Supplementary Figure S3.** SDS-PAGE of EW and its mixtures with EL, PL and TG in a simulated duodenal digestion medium, M: molecular mass marker, lane 1: EW; lane 2, EW:EL; lane 3, EW:PL and line 4, EW:TG.
